# Supplementary material
Source: Springer Nature journal article supplement (https://www.springermedizin.de/resource/supplementary/12885_2011_2969_MOESM7_ESM.pdf/9462412)

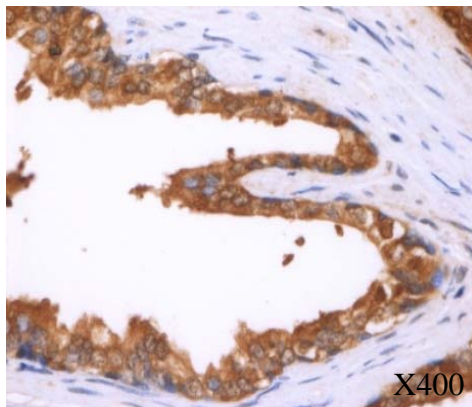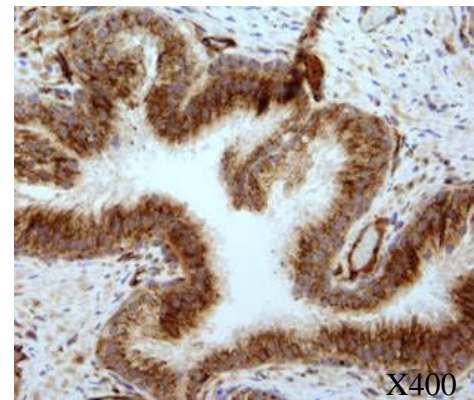

**A**

**B**

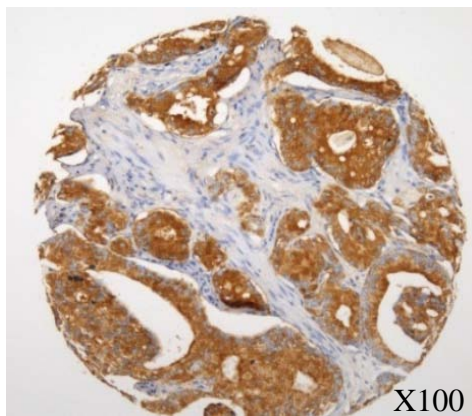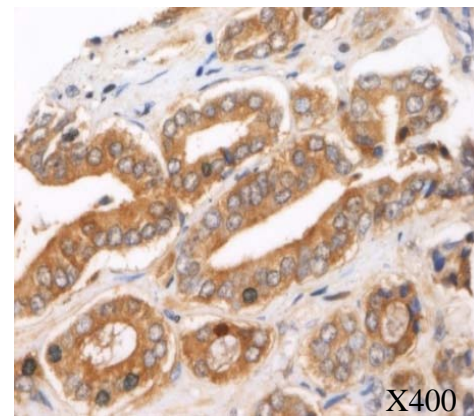

**C**

**D**

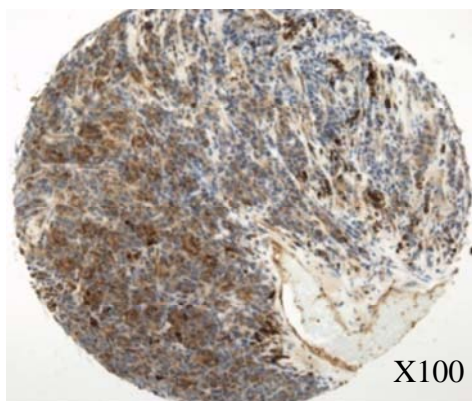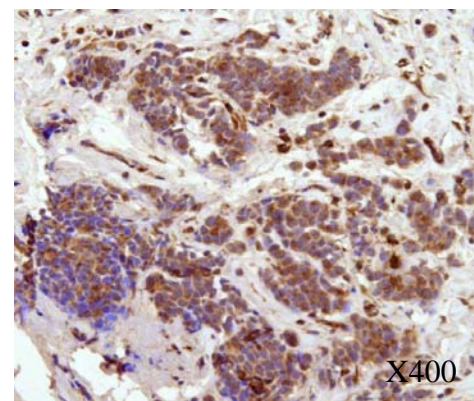

**E**

**F**

| FRS2 protein   |     |        | <i>p</i> value |
|----------------|-----|--------|----------------|
|                | -/+ | ++/+++ |                |
| Benign (n= 34) | 10  | 24     | <i>p</i> =0.05 |
| Cancer (n=129) | 66  | 63     |                |

**G**

| FRS3 protein   |     |        | <i>p</i> value |
|----------------|-----|--------|----------------|
|                | -/+ | ++/+++ |                |
| Benign (n= 34) | 21  | 13     | <i>p</i> =0.44 |
| Cancer (n=129) | 68  | 61     |                |

**H**

Supplement: MOESM7 [file 9462412]
